# Supplementary material for: Optical properties of Nd3+and Yb3+-doped AgM(IO3)4metal iodates: transparent host matrices for mid-IR lasers and nonlinear materials
Source: Royal Society of Chemistry journal article supplement (doi:10.1039/c3tc32517b), 2014-01-01
Supplement: c3tc32517b1.pdf [file c3tc32517b1.pdf]

## Supporting Information

### **Optical properties of Nd<sup>3+</sup> and Yb<sup>3+</sup> -doped AgM(IO<sub>3</sub>)<sub>4</sub> metal iodates: transparent host matrices for mid-IR lasers and nonlinear materials.**

Delphine Phanon <sup>I</sup>, Yan Suffren <sup>I</sup>, Mohamed B. Taouti <sup>II</sup>, Djamal Benbertal <sup>II</sup>, Alain Brenier <sup>III</sup>, Isabelle Gautier-Luneau <sup>I\*</sup>

<sup>I</sup> Université Grenoble Alpes, Institut NEEL, F-38042 Grenoble, France

<sup>II</sup> Université de Laghouat, Laboratoire de Physico-Chimie des Matériaux, BP 37G. Laghouat 03000, Algérie

<sup>III</sup> Institut Lumière Matière, UMR5306 Université Lyon 1-CNRS, Université de Lyon, 69622 Villeurbanne cedex, France

\*Corresponding author: [Isabelle.Gautier-Luneau@neel.cnrs.fr](mailto:Isabelle.Gautier-Luneau@neel.cnrs.fr)

Fax: +33 4 76 88 10 38; Tel: + 33 4 76 88 78 04

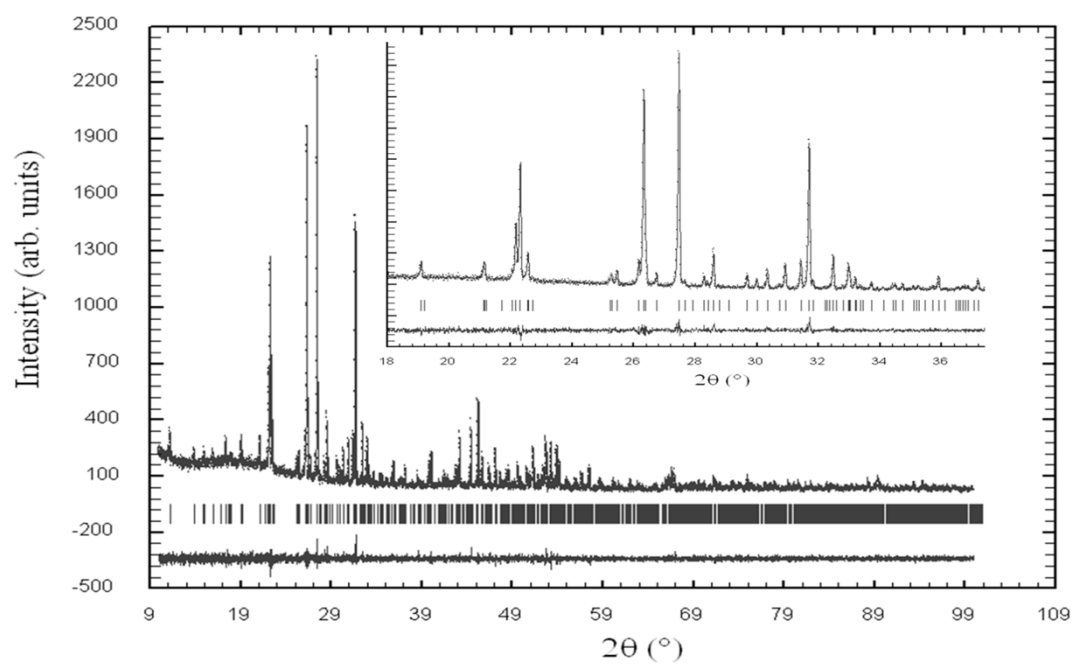

**Figure S1.** Observed (points), calculated (line) and difference (bottom line) X-ray diffraction pattern of NaNd(IO<sub>3</sub>)<sub>4</sub> measured on D8 Bruker ( $\lambda = 1.54056 \text{ \AA}$ ). Vertical lines indicate Bragg positions of the contribution phase NaNd(IO<sub>3</sub>)<sub>4</sub>.

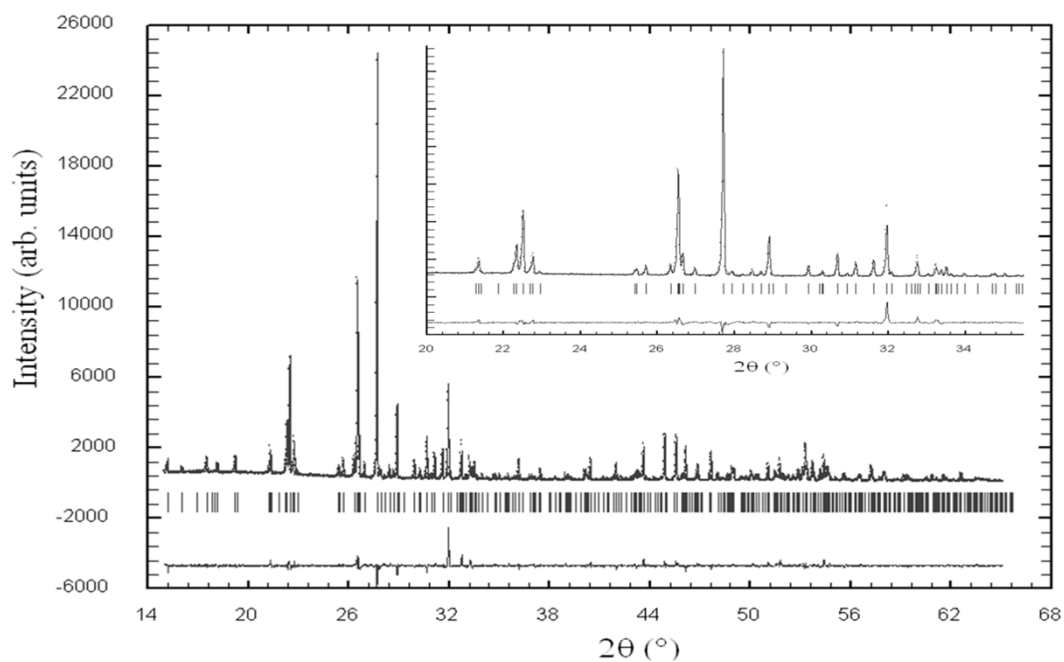

**Figure S2.** Observed (points), calculated (line) and difference (bottom line) X-ray diffraction pattern of  $\text{NaGd}(\text{IO}_3)_4$  measured on D8 Bruker ( $\lambda = 1.54056 \text{ \AA}$ ). Vertical lines indicate Bragg positions of the contribution phase  $\text{NaGd}(\text{IO}_3)_4$ .

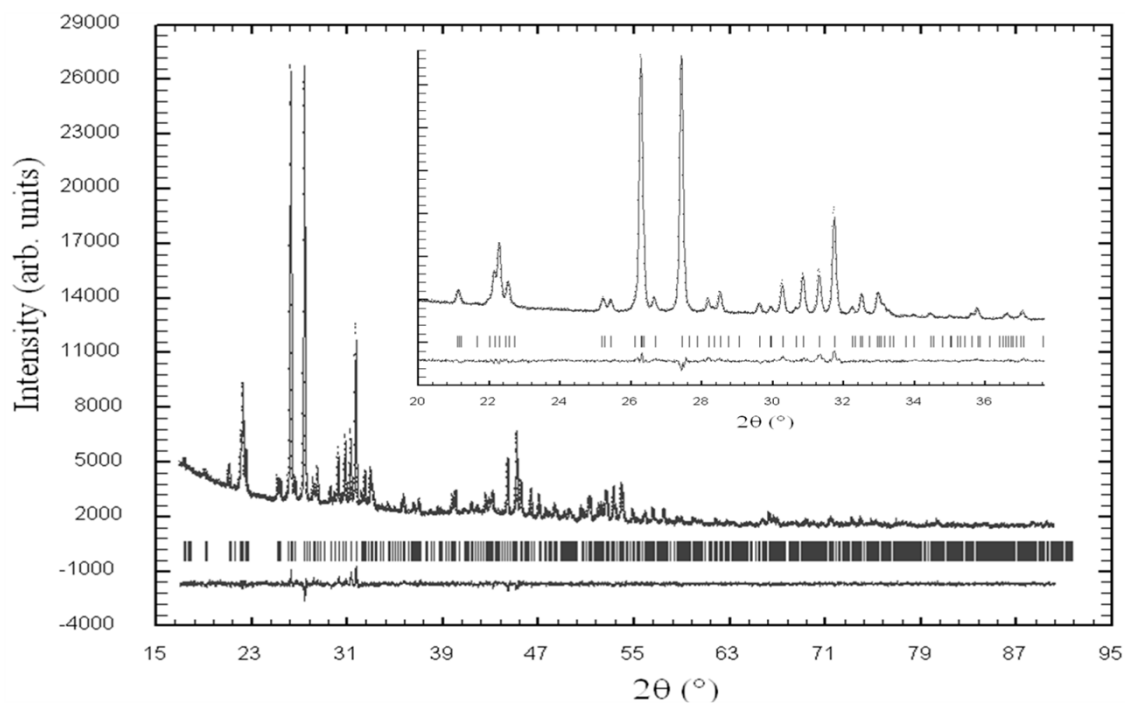

**Figure S3.** Observed (points), calculated (line) and difference (bottom line) X-ray diffraction pattern of  $\text{AgNd}(\text{IO}_3)_4$  measured on D8 Bruker ( $\lambda = 1.54056 \text{ \AA}$ ). Vertical lines indicate Bragg positions of the contribution phase  $\text{AgNd}(\text{IO}_3)_4$ .

**Table S1** Coordination schemes of iodate anion towards cations in  $\text{NaM}(\text{IO}_3)_4$ ,  $M=\text{Y}$ , Nd, Gd and  $\text{AgM}'(\text{IO}_3)_4$ ,  $M'=\text{Y}$ , La, Nd, Eu, Gd, Bi.

| Iodate group                                    | coordination schemes                                                                 |
|-------------------------------------------------|--------------------------------------------------------------------------------------|
| I(1)O <sub>3</sub>                              | 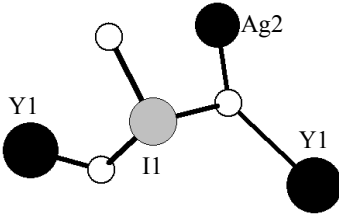   |
| I(2)O <sub>3</sub><br>and<br>I(7)O <sub>3</sub> |    |
| I(3)O <sub>3</sub><br>and<br>I(5)O <sub>3</sub> |   |
| I(4)O <sub>3</sub>                              |  |
| I(6)O <sub>3</sub>                              |  |
| I(8)O <sub>3</sub>                              |  |

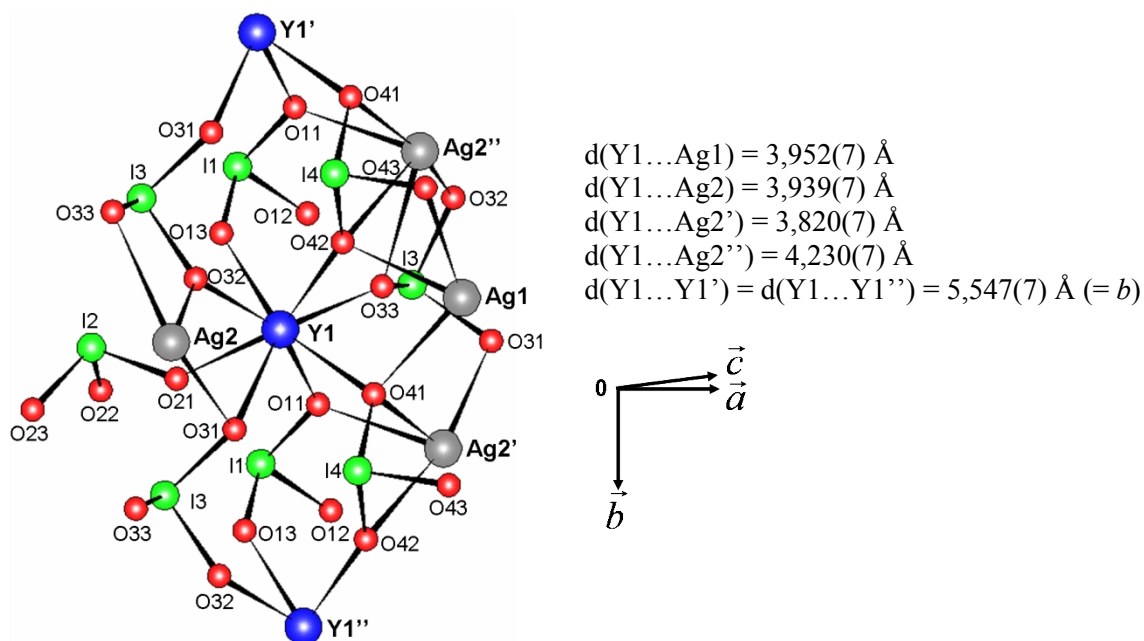

**Figure S4** : Environment of Y1 in  $AgY(IO_3)_4$  showing the nearest metal neighbors. Each  $\{Y(1)O_8\}$  polyhedron is linked by edge-sharing to four metals (one Ag1 and three Ag3 atoms) and connected via (M-O-I-O-M) bridging to two Y1 atoms.

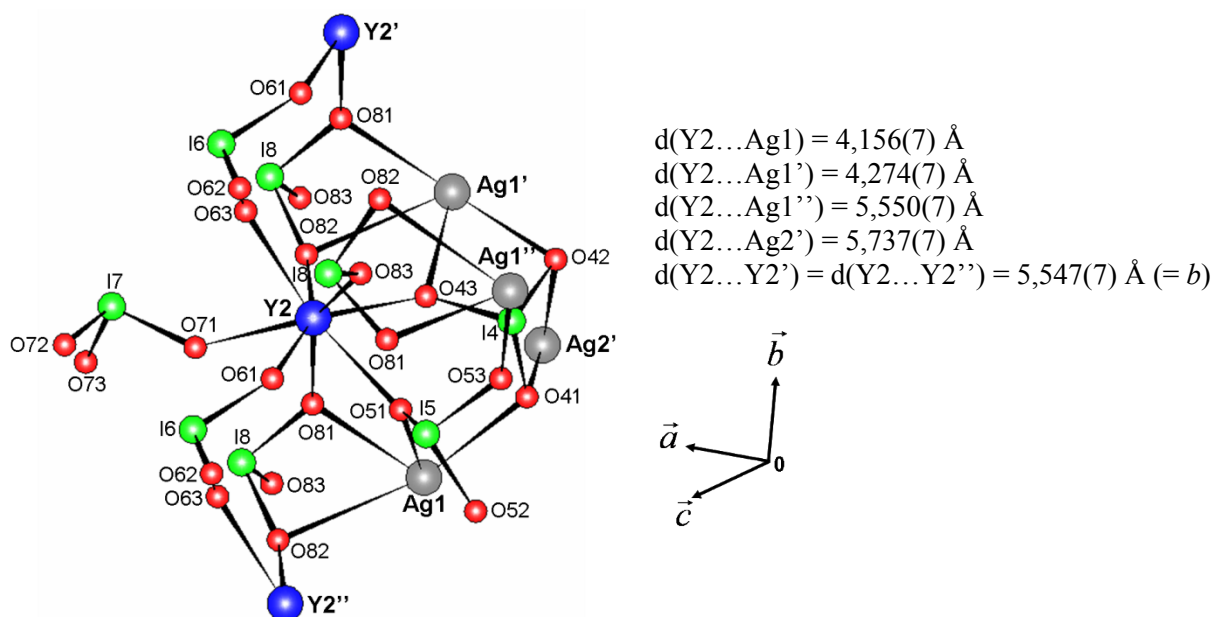

**Figure S5** : Environment of Y2 in  $AgY(IO_3)_4$  showing the nearest metal neighbors. Each  $\{Y(2)O_8\}$  polyhedron is linked by edge-sharing to Ag1 atoms and connected via (M-O-I-O-M) bridging to four atoms (1 Ag1, 1 Ag2 and 2 Y2).

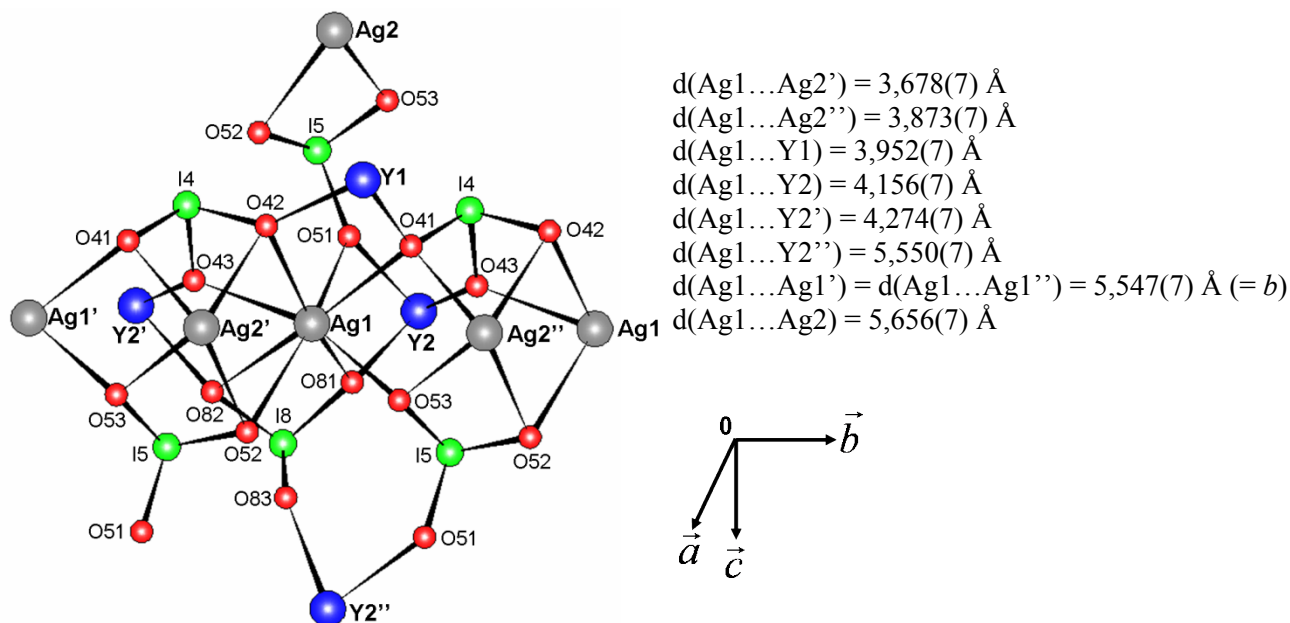

**Figure S6:** Environment of Ag1 in  $\text{AgY}(\text{IO}_3)_4$  showing the nearest metal neighbors. Each  $\{\text{Ag}(1)\text{O}_8\}$  polyhedron is linked by edge-sharing to five metals: two Ag2, two Y2 and one Y1 atoms, and connected via (*M-O-I-O-M*) bridging to one Y1, two Ag1 and one Y2 atoms.

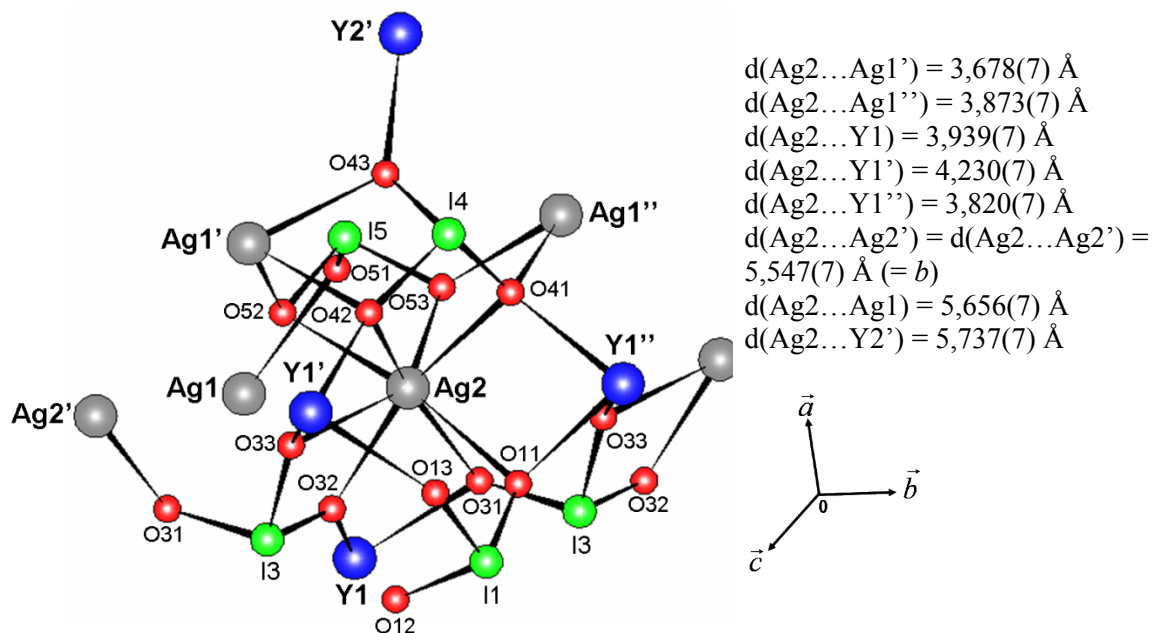

**Figure S7:** Environment of Ag2 in  $\text{AgY}(\text{IO}_3)_4$  showing the nearest metal neighbors. The  $\{\text{Ag}(2)\text{O}_8\}$  polyhedron is linked by edge-sharing to three Y1 atoms and two Ag1 atoms, and connected via (*M-O-I-O-M*) bridging to one Ag1, two Ag2 and one Y2 atoms.

**Thermal analyses:** DSC analyses were carried out on a NETZSCH ATD-DSC 404S apparatus and ran in the range 25-700°C, in argon flow at 5°C/min heating rate. DSC curves of NaY(IO<sub>3</sub>)<sub>4</sub>, AgY(IO<sub>3</sub>)<sub>4</sub>, AgBi(IO<sub>3</sub>)<sub>4</sub> and AgLa(IO<sub>3</sub>)<sub>4</sub> are shown in Fig. 7a and b.

DSC curve of NaY(IO<sub>3</sub>)<sub>4</sub> shows only one decomposition peak at 550°C. The residue has been identified as the cubic phase of Y<sub>2</sub>O<sub>3</sub> (JCPDS file no.76-0151). No phase transition is observed before 550°C. Decomposition of AgY(IO<sub>3</sub>)<sub>4</sub> is done in two steps. The first peak centred at 430°C corresponds to the formation of a new phase which has not been identified. The second peak at 550°C is due to a mixture of AgI (JCPDS file no.01-0502) and Y<sub>2</sub>O<sub>3</sub> (JCPDS file no.76-0151 cubic phase). Studies lead in furnace, do not reveal phase transition before 430°C.

AgBi(IO<sub>3</sub>)<sub>4</sub> also decays in two steps. The first peak at 490°C corresponds to the formation of a mixture of AgI (JCPDS file no.01-0502) and Bi<sub>5</sub>O<sub>7</sub>I (JCPDS file no.40-0548). At 540°C, residue has been identified as Bi<sub>2</sub>O<sub>3</sub> (JCPDS file no.78-1793 tetragonal phase). No phase transition is observed before 490°C.

Decomposition of AgLa(IO<sub>3</sub>)<sub>4</sub> is done in two step. The first peak at 500°C highlights the fusion of the compound. The second peak at 530°C shows the formation of a mixture of AgI and La<sub>2</sub>O<sub>3</sub>. No phase transition is observed before 500°C.

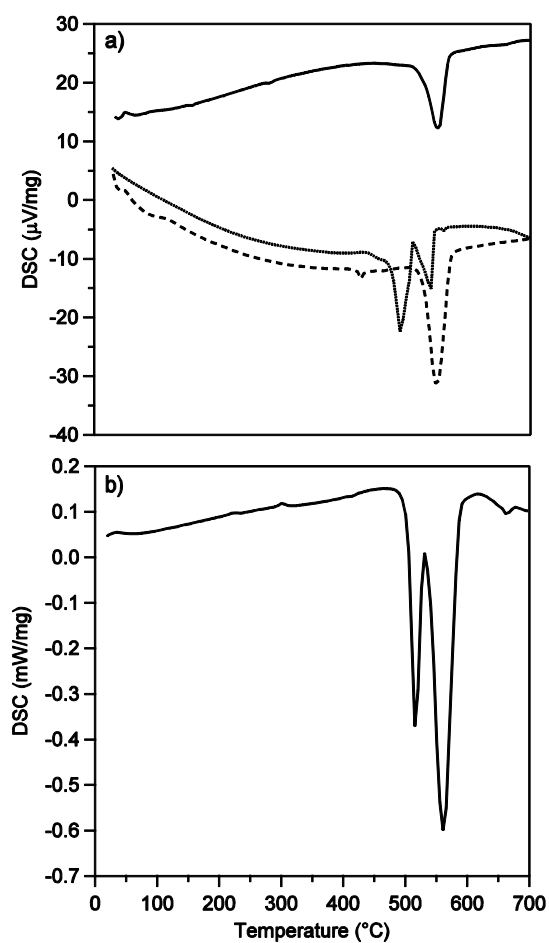

**Figure S8** DSC curves of a)  $\text{NaY}(\text{IO}_3)_4$  (—),  $\text{AgY}(\text{IO}_3)_4$  (---)  $\text{AgBi}(\text{IO}_3)_4$  (···) and b)  $\text{AgLa}(\text{IO}_3)_4$ .

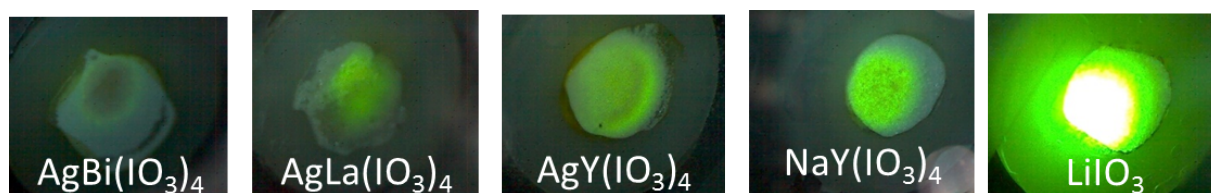

**Figure S9** : Photographies showing the intensities of the emitted second harmonic generation by powders. The comparison of intensities allows us to give the followed ranking:  
 $\text{AgBi}(\text{IO}_3)_4 < \text{AgLa}(\text{IO}_3)_4 < \text{AgY}(\text{IO}_3)_4 < \text{NaY}(\text{IO}_3)_4 < \alpha\text{-LiIO}_3$ .
